# Supplementary material
Source: Springer Nature journal article supplement (https://www.springermedizin.de/resource/supplementary/12906_2013_1643_MOESM2_ESM.pdf/9523334)

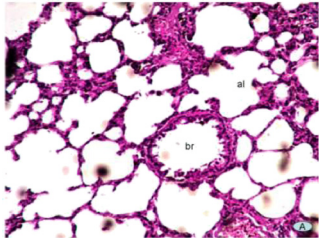

A

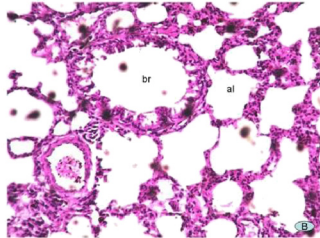

B

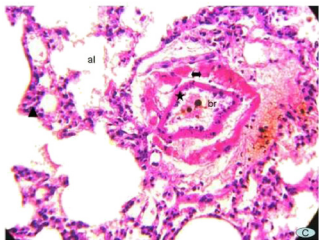

C

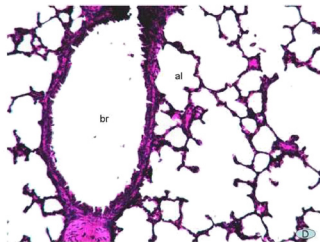

D

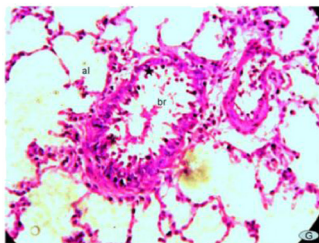

E

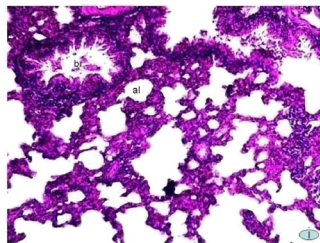

F

Supplement: MOESM2 [file 9523334]
